# Supplementary material for: Referrals, Symptoms and Treatment of Patients Referred to a Secondary Spine Centre—How Can We Help?
Source: MDPI journal article supplement (doi:10.3390/jcm12113840), 2023-06-04

Figure S1. Histograms of questionnaire scores, comparing patients receiving in-hospital care and no in-hospital care.

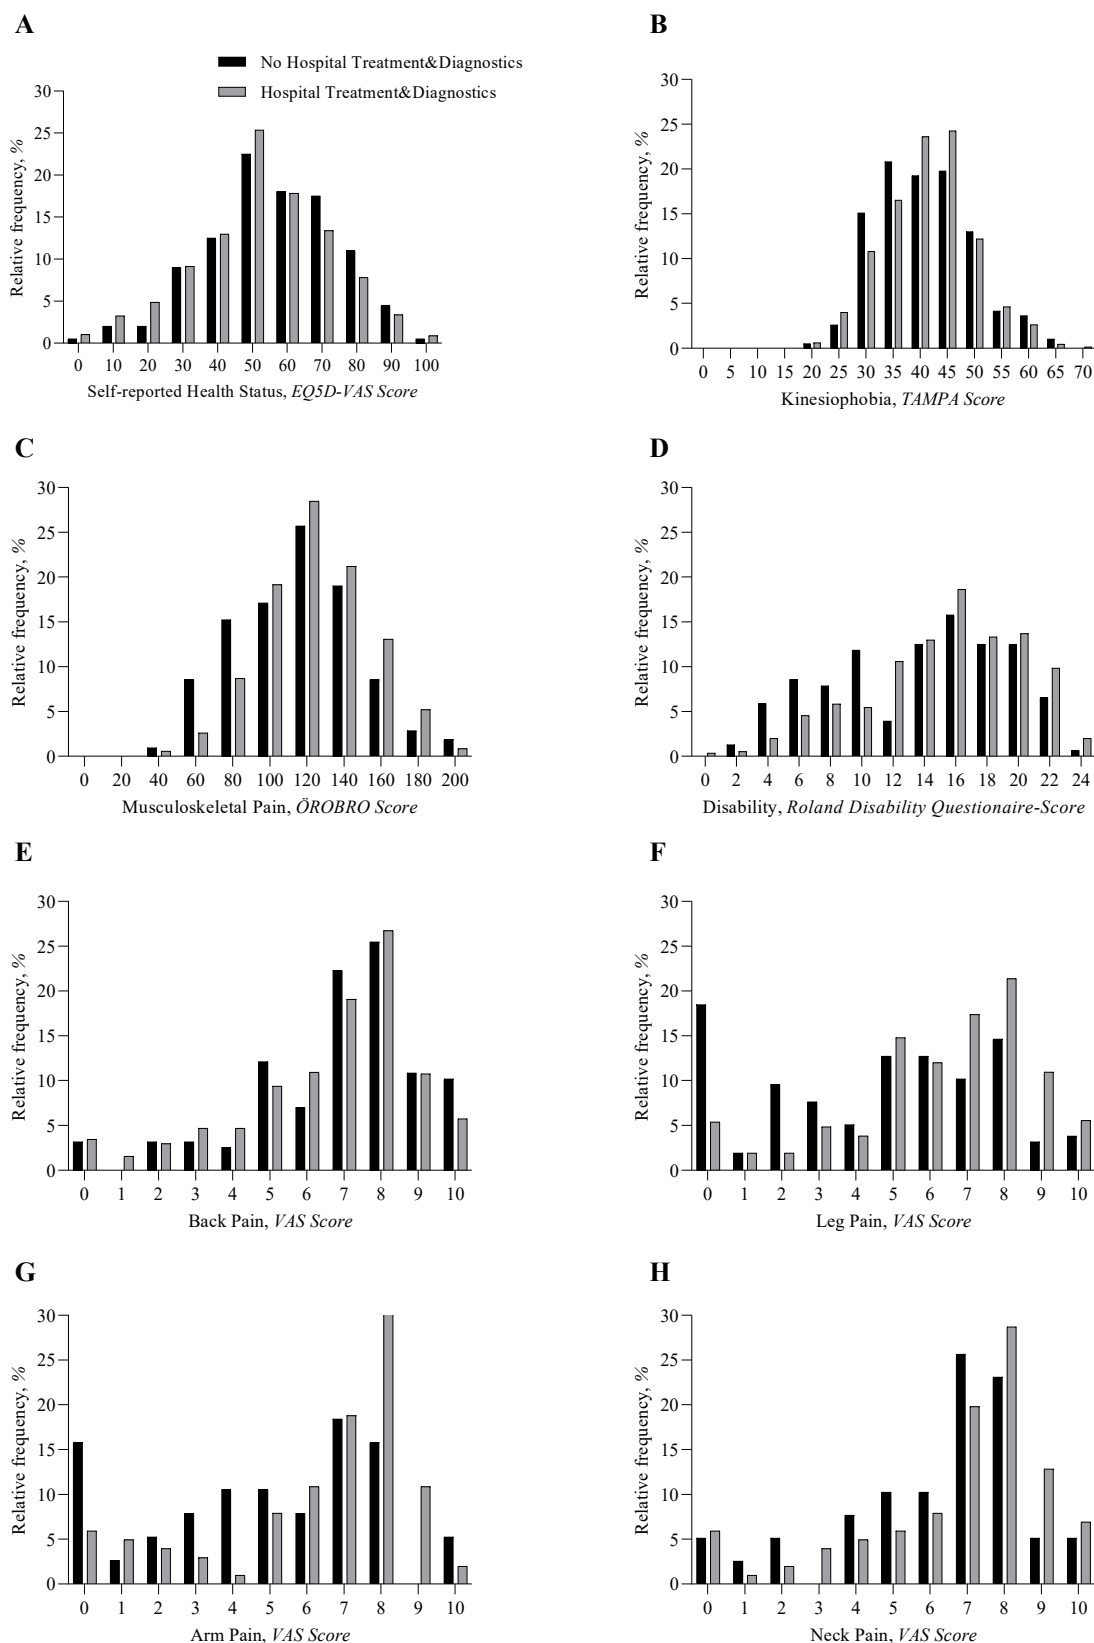

Supplement: s1 [file s1]
